# Supplementary material
Source: Frontiers journal article supplement (https://www.frontiersin.org/articles/186520)
Supplement: Table_1.pdf [file Table_1.pdf]

Jefferson Scale of Empathy (Medical Student version):

| #  | Question                                        | Empathy Subcomponent |
|----|-------------------------------------------------|----------------------|
| 1  | Physicians' understanding of their patients'... | Cognitive            |
| 2  | Patients feel better when...                    | Emotional            |
| 3  | It is difficult for a physician...              | Cognitive            |
| 4  | Understanding body language is...               | Cognitive            |
| 5  | A physician's sense of humor...                 | Behavioral           |
| 6  | Because people are different...                 | Cognitive            |
| 7  | Attention to patients' emotions...              | Emotional            |
| 8  | Attentiveness to patients' personal...          | Cognitive            |
| 9  | Physicians should try to...                     | Cognitive            |
| 10 | Patients value a physician's...                 | Emotional            |
| 11 | Patients' illnesses can be cured...             | Emotional            |
| 12 | Asking patients about...                        | Behavioral           |
| 13 | Physicians should try to...                     | Cognitive            |
| 14 | I believe that emotion...                       | Emotional            |
| 15 | Empathy is a therapeutic...                     | Behavioral           |
| 16 | Physicians' understanding of the...             | Emotional            |
| 17 | Physicians should try to...                     | Cognitive            |
| 18 | Physicians should not allow...                  | Emotional            |
| 19 | I do not enjoy...                               | Behavioral           |
| 20 | I believe that...                               | Cognitive            |

Appendix 1: The nature of each question in the Jefferson Scale of Empathy (Medical Student version) is listed with our classification scheme of empathy subcomponents. © *Thomas Jefferson University, 2001. All rights reserved.* Jefferson, as the sole copyright holder, maintains the copyright for granting or declining permission for any additional use of any and all versions of the JSE.
